# Supplementary material for: Utility, Limitations, and Future of Non-Human Primates for Dengue Research and Vaccine Development
Source: Front Immunol. 2014 Sep 24;5:452. doi: 10.3389/fimmu.2014.00452 (PMC4174039; doi:10.3389/fimmu.2014.00452)
Supplement: Supplementary file 1 [file Data_Sheet1.XLSX]

## Sheet: Table S1
Frontiers in Immunology																	Supplementary Material
Supplementary Material
Utility, Limitations and Future of Non-Human Primates for Dengue Research and Vaccine Development
Carlos A. Sariol1 and Laura J. White2*
Caribbean Primate Research Center, Department of Microbiology and Medical Zoology, Department of Internal Medicine, University of Puerto Rico-Medical Sciences Campus, San Juan, Puerto Rico1; Global Vaccine Incorporation, Research Triangle Park, North Carolina2.
Correspondence: Dr. Laura J. White, Director of Research Global Vaccines, Inc. , PO Box 14827, 801-11 Capitola Dr. Durham, NC 27713-4827. ljwhite@globalvaccines.org
Supplementary Table 1. Summary of published dengue vaccine studies in NHP
Vaccine platform (Developer)	First author, year (reference #)	Vaccine (DEN strains)	Study	NHP		Vaccine formulation / (doses) / route	Vaccine schedule	Neutralizing Abs				Cell Mediated Immunity	Challenge						Tested in clinical trial, First author, year (reference #)
				Species (source)	# monkeys /group			Assay (Cells)	DEN strains	Bleed day Neut titers serotypes 1,2,3,4	Seroconversion rates: # with titer >10 / total		DEN strains	dose / route	Time post last vaccine	Virus detection method	# Viremic/ # Tested (controls #V/#T)	Anamnestic Response (>4-fold increase)
LAV Chimeric YF-DEN CYD (Acambis/ Sanofi Pateur)	Guirakhoo 2000 (13)	Monovalent CYD-2 (PUO-218)	Safety, Immuno-genicity, Protection	Rhesus macaques, Tulane (TRPRC)	4-5	CYD-2 Dose-response (10E2- 10E5 PFU)	Single dose	PRNT50 (Vero cells)	DV2 S16803	Dose dependent NAb response	18/18	ND	WT DV2 S16803	10E5 FFU	62 days	Immuno-focus forming assay (IFF) C6/36 cells	0/18	Yes, except 2 animals in high dose	Guirakhoo 2006 (67)
					3-4	CYD-2 vs. DEN2 in YF-immune monkeys (10E4 PFU)					3/3 4/4						0/3 0/4 (4/4)
	Guirakhoo 2001 (10)	Monovalent, Tetravalent CYD (prME genes from DV1: PUO-359; DV2: PUO-218; DV3: PaH881/88; DV4:1228)	Safety, Immuno-genicity	Rhesus macaques, Tulane (TRPRC)	3	Monovalent CYD DEN1,3,or 4, (3.6 - 4.3log10 PFU)	Single dose, Boost at 6 months	PRNT50 (Vero cells)	WT parental	Day 79 GMT1,3,4: 254, 29, 117	After 1 dose: 8/9	ND	<-------------------- ND ------------------>				Post-boost viremia 4/9	Anamnestic response in all animals after a 6-month boost
					6	Tetravalent (4.7log10 PFU each)				Serotype 2 dominant. GMT1-4: 101, 1015, 34, 80	After 1 dose: 6/6						Post-boost viremia 0/6
	Guirakhoo 2002 (11)	Monovalent, Tetravalent CYD reconstructed to correct aa substitutions in DV1, 3 and 4	Safety, Immuno-genicity	Rhesus macaques (Chinese origin) Sierra Biomedical Inc.	4 MV, 6 TV	Reconstructed CYD-1, CYD-3, CYD-4, (~10E5 PFU each), CYD-2 (10E3 PFU) S.C.	Two doses, days 0, 60	PRNT50 (Vero cells)	Homologous chimeric viruses and heterologous WT.	Serotype 4 dominant. Day 30 GMT: 359, 403, 254, 1437	After 1 dose: 100%	ND	<------------------------------- ND ------------------------------------>
	Guirakhoo 2004 (12)	Tetravalent CYD-TDV	Safety, Immuno-genicity, Protection	Cynomolgus macaques (Sierra Division)	6	CYD-TDV cGMP lot P10 (+serum). Four formulations (DEN1-4 log10 PFU): F1: 5555, F2: 3333, F3: 3553, F4: 5553	Single dose	PRNT50	Homologous chimeric viruses	Day 30 GMT: 5555:113, 718, 285, 1140. 3333: 80, 56, 403, 1280. 3553: 80, 218, 320, 31. 5553: 142, 34, 489, 66	After 1 dose, F1 and F4 100%	ND	WRAIR/WHO WT strains	10E5 FFU	6 months	Plaque assay and IFF	D1: 1/6 D2: 0/6 D3: 0/6 D4: 1/6 (16/16)	Yes	Morrison 2010 (74), Dayan 2013 (61), Guy 2008 (68), Leo 2012 (71), Lanata 2012 (70), Poo 2010 (76), Sabchareon 2012 (81), Capeding 2014 (80) Currently in Phase III
								IF inhibition assay	WRAIR / WHO Ref. strains
	Guy 2009 (14)	Monovalent, Tetravalent CYD-TDV	Immuno-genicity, Interference	Cynomolgus macaques (Noveprim, Mauritus; Housed at Sanofi Pasteur)	4	CYD-TDV Clinical bulk or PhII batches, serum-free. 4 experiments, 13 groups, MV, TV 5555 & 5553	Two doses days 0, 56; Boost after 1 year in subset	SN50	Mahidol strains	5555 Day 84: 80, < , 13, 126. Day 370: 95, < , 12, 169 5553 Day 84: 358, 24, 50, 100. Day 370: 89, 25, 26, 56		ND	<----------------------------- ND ----------------------------->					Anamnestic response after 6 month boost
						Complementary bivalent vaccines separated in sites or time				Day 84: 142, 25, 12, 225
	Barban 2012 (8)	Tetravalent CYD-TDV	Immuno-genicity: breadth of Neuts	Cynomolgus macaques in Guy 2009 study		CYD-TDV	Pooled sera (15 days after 3rd dose)	SN50	Panel of 82 viruses	Netralization was observed across all serotypes, genotypes, geographic origins and years		ND	<------------------------------------ ND ------------------------------------>
LAV Chimeric YF-DEN	Galler 2005 (9)	Chimeric YF-DEN-2	Safety, immuno-genicity	Rhesus monkeys (FIOCRUZ)	7	17D-D2 naïve monkeys, S.C.	One or 2 doses	PRNT50 (Vero)		Nabs associated with protection in 6/7 animals		ND	WT DEN2 44-2	10E4.8 PFU	60 days	Plaque assay and RT-PCR	1/7	Yes, in most animals
					11	17D-D2 YF-immune, S.C.				Significantly lower NAbs							6/7
	Trindade 2008 (15)	Chimeric YF-DEN-2, YF-DEN4	Safety, Vaccine replication			17D-D2, 17D-D4, S.C., I.C.		<------------------------------------------------------------------------------------ ND ----------------------------------------------------------------->
LAV 3' NCR mutations USDA/WRAIR	Markoff 2002 (20)	Monovalent rDEN1 (3' NCR mutations)	Safety, immuno-genicity	Rhesus macaques (Closed col. Morgan Island. SC)	2-3	MV rDEN1mutF10E3, 10E4, 10E5 PFU	Single dose	PRNT50 (LLC-MK2 cells)	DEN1 WP	Pre-chall. titers after 12 mo: range 80-320		ND	WT DEN1 WP	10E4 PFU, 10E6 PFU	12 months, 17 months	Plaque assay and RT-PCR	0/3 (3/3) 0/2 (4/4)	Yes
LAV 3' NCR mutations (NIAID, NIH)	Men 1996 (21)	DEN4 deletions in 3' NCR for attenuation	Attenuation, immuno-genicity	Rhesus macaques	4	5 mutant viruses and parental strains, 10E5 PFU S.C.		RIP		GMT range: 28-334		ND	<------------------------------------ ND ------------------------------------>
LAV 3' NCR Δ30 and chimerization (NIAID, NIH)	Durbin, 2001 (19)	Monovalent rDEN4Δ30	Safety	Rhesus macaques	6	2A3Δ30		PRNT (Vero)		Day 28 GMT:198		ND	DEN4 814669	10E5 FFU	Day 42	Amplification and Plaque assay in Vero cells	0/6		Durbin 2001, (19), 2006 (63), 2011 (4, 64-65), Lindow 2012 (72), 2013 (73)
					4	rDEN4Δ30 10E5 PFU S.C.				223							0/4
	Whitehead 2003 (22)	Monovalent rDEN1	Attenuation, Immuno-genicity.	Rhesus macaques	4	MV rDEN1Δ30, rDEN1mutFMV 10E5 PFU S.C.	Single dose	PRNT60	DEN1 WT	Day 28 PRNT60 GMT: 780-1486		ND	WT rDEN1	10E5 PFU	Day 28	Plaque assay in Vero cells	0/4 0/4	No
	Blaney 2005 (16)	Tetravalent (LATV) (Parental strains: DEN1 Nauru/74 (WP), DEN2 Tonga/74, DEN3 Sleman/78, DEN4 Dominica/81)	Safety, Immuno-genicity, Protection	Rhesus macaques	6	TV-1 (10E5 ea) (rDEN1Δ30, rDEN2Δ30, rDEN3Δ30, rDEN4Δ30)	Single dose	PRNT60	DEN1-4 NIAID WT challenge strains and 4 genotypes within each serotype tested for breadth of NAbs	Day 28 GMT: 52, 67, 273, 79	1	ND	<------------------------------------ ND ------------------------------------>						Durbin 2013 (62), currently in Phase II
					16 (4 per challenge group)	TV-2 (10E5 ea) (rDEN1Δ30, rDEN2/4Δ30, rDEN3/4Δ30, rDEN4Δ30)	Single dose			Day 28 GMT: 57, 16, 18, 126	81%-13%-19%-100% (day 28)	ND	DEN1-4 NIAID WT chall. strains		Day 42	Plaque assay in Vero cells	0/4 for D1, D3, D4. 3/4 for D2. (8/8)	Yes after D1, D2, D3 challenge
					6	TV-3 (10E5;10E6 D3)(rDEN1Δ30, rDEN2Δ30, rDEN3/4Δ30, rDEN4Δ30)	Single dose			Day 28 GMT: 59, 117, 91, 144	1	ND	<------------------------------------ ND ------------------------------------>
					6	TV-2	Boost at month 1 or 4			GMT: all >100 (1 month post boost)	100% after 4 month boost	ND	<------------------------- ND -------------------------------->					No AR after 1 month boost
					4-6	TV-2, TV-3	2 doses, month 0, 4					ND	WT DENV2 NGC	10E5 PFU	1 month post-boost	Plaque assay in Vero cells	0/10 (4/4)
	Blaney 2007 (18)	Monovalent rDEN1 (Puerto Rico/74)	Attenuation, immuno-genicity, protection	Rhesus macaques	4	rDEN1/4 (CME) (10E5 PF, S.C. all groups)	Single dose	PRNT60	DEN1 Puerto Rico/94	Day 28 GMT: 56	100%,	ND	DENV1 Puerto Rico/94	10E5 PFU	Day 35	Plaque assay in Vero cells	0/4
					4	rDEN1/4Δ30(CME)				<5	0						4/4
					4	rDEN1/4 (ME)				65	1						0/4
					6	rDEN1/4Δ30(ME)				23	0.66						0/6
LAV (NIAID/NIH)	Blaney 2008 (17)	Monovalent rDEN3 (Sleman/78)	Safety, Immuno-genicity, Protection	Rhesus macaques	4	rDEN3Δ30/31, (10E5 PFU)	Single dose	PRNT60	DEN3 Sleman/78	Day 28 GMT: 304		ND	WT DENV3 Sleman /78	10E5 PFU	Day 35	Plaque assay in Vero cells	0/4
					4	rDEN3Δ86				224							0/4
					4	rDEN3-3'D4				229							0/4
					4	rDEN3-3'D4Δ30				77							0/4 (2/2)
LAV Chimeric DEN/DEN	Bray 1996 (24)	rD1/D4, rD2/D4 Chimeras (DEN4 814669 backbone)	Immuno-genicity, protection	Rhesus macaques	4	rD1CME/D4	Single dose	PRNT50 (LLC-MK2 cells)	DEN1 WP, DEN2 NGC Proto, DEN4 814669		3/4	ND	Parental strains	3x10E5 PFU	Day 66		1/4
					4	rD2ME/D4					4/4						0/4
					4	rD4											4/4
					8	rD1/D4 + D2/D4					8/8						0/8
	Butrapet 2003 (25)	Chimeric DEN2/DEN1 (ME genes from DEN1-16007, BB from DEN2-PDK53)	Immuno-genicity	Cynomolgus macaques (AFRIMS)	3	DEN2/1-EP; DEN2/1-VP 10E6 PFU S.C.	2 doses, days 0, 93	PRNT50 (LLC-MK2 cells)	Mahidol strains		Day 30: 6/6; Day 90: 4/6	T cell activation by serum IL-2, IFNg	WT DEN1-16007; second challenge with DEN2-16681	10E6	Day 14 and 146 days after challenge1	RT-PCR and Plaque Assay	After DEN1 challenge: 4/6 (2/2)
LAV Chimeric DEN/DEN (CDC/Inviragen/Takeda)	Osorio 2011 (26)	Tetravalent DENVax (DEN/DEN chimeras on rDEN2-PDK-53 backbone) prME sequences from DEN1, 3 and 4 Mahidol strains	Safety, Immuno-genicity, Protection	Cynomolgus macaques (Wisconsin National Primate Research Center)	8 (2 per chall. group)	3 TV formulations: F1(3333), F2(3355), F3(5555) (pre-master seed, non-GMP, serum-free), I.D., S.C.	2 doses, days 0, 60	PRNT50	DEN1-4 Mahidol strains	Day 91 GMT, F1: 91, 1092, 87, 6 F2: 70, 334, 320, 73 F3: 306, 554, 320, 36	Day 91: F1(%):100, 100,100 38. F2 (%):88, 100, 100, 100. F3 (%): 100,100, 100, 88	PBMC stimulated ex vivo with WT DENV2. IL-2- and IFNg-ELISPOT.	DEN1-4 NIAID WT challenge strains	10E5 PFU	Day 30	qRT-PCR and plaque assay in vero cells	F1: 1/2, 0/2, 0/2, 0/2 F2: 1/2, 1/2, 0/2, 0/2 F3: 0/2, 0/2, 0/2, 0/2; (8/8)	Yes, in most animals	Osorio 2014 (75), Currently in phase II
	Ambuel 2014 (23)	Tetravalent DENVax	Safety, Immuno-genicity, Protection	Cynomolgus macaques (Wisconsin National Primate Res. Center)	3	Full TV dose: 2x10E4 DV1, 5x10E4 DV2, 1x10E5 DV3, 3x10E5 DV4; (one in each arm)	2 doses days 0,0 S.C. PhJ	MN50	DEN1-4 Mahidol strains	Day 88 GMT: 80, 2032, 40, 40		PBMC stimulated with peptide pools (NS1, NS3, NS5). By I.C.S, induction of CD4+ and CD*+ in group s.c. PhJ	DEN2 NGC	10E5 PFU	Day 90	qRT-PCR	0/3	No
					3		2 doses days 0,0 I.D. PhJ			Day 88 GMT: 254, 508, 101, 64							0/3
					3		2 doses days 0,60 S.C. PhJ			Day 88 GMT: 320, 1613, 127, 50							0/3 (3/3)
LAV PDK-cell passage (WRAIR/GSK)	Eckels 2003 (27)	Monovalent strains (attenuation by passage in PDK cells) (PDK parental strains)	Safety, immuno-genicity, down-selection	Rhesus macaques	3-4	Strain sets for each serotype serially passaged and parental strains	Single dose	PRNT50 (LLC-MK2 cells)	DEN1,3,4 WRAIR/ WHO Ref. strains	12 vaccine candidates selected for phase I		ND	<------------------------------------ ND ------------------------------------>
LAV PDK-cell passage (WRAIR/GSK)	Sun 2006 (29)	Tetravalent (strains DEN145AZ5 PDK20; DEN2 S16803 PDK50; DEN3 CH53489 PDK20; DEN4 341750 PDK20)	Safety, Immuno-genicity, Protection	Rhesus macaques, Indian origin (USAMC-AFRIMS)	20 (5 per challenge group)	Dose formulation F(6655) (GMP lots) S.C.	2 doses, days 0, 60	PRNT50 (LLC-MK2 cells)	DEN1-4 Mahidol strains	Pre-challenge GMT: 317, 485, 121, 28	After 1 dose (%): 95, 100, 70, 15. After 2 doses(%): 100, 100, 90, 70.	ND	DEN1,2,4 WRAIR/WHO Ref. strains, DEN2 PDK-10	5x10E3-5x10E4 PFU	4.5 months	nested RT-PCR; intrathoraxic inoculation into T.s. mosquitoes	DEN1:1/5, DEN2: 0/5, DEN3:1/5, DEN4:3/5	Yes for serotypes 1, 3 and 4	Hoke 1990 (69) Bhamarapravati 1987, 1989 (59-60), Edelman 2003 (66), Sun 2003 (78), Simasathien 2008 (77), Thomas 2013 (79 )
LAV PDK-cell passage (Erasmus MC/ViroClinics/GSK)	Koraka 2007 (28)	Tetravalent, by GSK (Strains DEN1 WP74 45AZ5 PDK27; DEN2 S16803 PDK50; DEN3 CH53489 PDK20; DEN4 341750 PDK6)	Immuno-genicity, protection	Cynomolgus macaques (Erasmus MC)	6	TV formulation (5,4,4,6) TCID50 Flavi naïve	2 doses, 0, 6 months	VN (LLC-MK2 cells)		Pre-challenge titers >100 in all animals		IFNg-ELISPOT (DEN-infected B-LCLs for PBMC stimulation)	DEN4		6 months	Real time RT-PCR	0/6	Yes
					6	TV formulation (5,4,4,6) TCID50 DEN3 immune					After 1 dose, 100%						0/6	No
LAV (Arbovax)	Smith 2012 (31)	Monovalent Host-range attenuated DEN2 (Parent strain 16681)	Attenuation, immuno-genicity, protection	African green monkeys (RxGen)	4	DV2ΔGVII (7.5x10E3), DV2G460P (7.5 x10E4), DV2ΔLIG (2.3x10E4), DV2PDK50 (2.3x10E3 FFU) S.C.	Single dose	PRNT50 (Vero cells)	DEN2 NGC	Day 14 GMT: 107-226. Day 57 GMT: <10		ND	WT DEN2 S16803	10E5 PFU	Day 57	Infectious Center Assay in C7-10 cells	Reduced viremia duration by at least 2 days	Yes
	Briggs 2014 (30)	Tetravalent Host-range attenuated (DEN1-4 parent strains: WP74, 16681, ABV, 341750)	Immuno-genicity, protection	African green monkeys	16 (4 per challenge group)	TV formulations: HR-Tet 10E6 IC of each serotype. WT-Tet as control	Single dose, 4 limbs (1 serotype in each limb)	PRNT50 (Vero cells)	DEN1 WP74, DEN2 NGC, DEN3 CH53489, DEN4 341750	Day 62, GMT 538, 129, 91, 247	Day 62, 100%	ND	WT DEN1 HI, DEN2 S16803, DEN3 H87, DEN4 H241	10E5 IC	Day 62	Infectious Center Assay in C7-10 cells	DEN1: 4/4 (lower viremia), DEN2 4/4, DEN3 4/4 (lower viremia), DEN4 4/4 (lower shorter viremia)(4/4)	yes
LAV (Singapore Immunology Network/ Novartis ITD)	Zust 2013 (32)	Monovalent 0-methyltransferase mutants DEN1, DEN2	Attenuation, immuno-genicity	Rhesus macaques	4	DEN2 E217A (10E3, 10E4, 10E5 PFU)	Single dose	PRNT50 (BHK-21 cells)	DEN2-TSV01	Day 30 GMT: (low, medium, high doses): 92, 216, 119	100% all groups	ND	WT DEN2	10E5 PFU	Day 64	Plaque assay in BHK-21 cells	0/10 (4/4)	Yes, 10E3 dose
DNA (NMRC)	Raviprakash 2000 (39)	Monovalent DNA DEN1 prME (Genes from WP74)	Immuno-genicity, protection	Rhesus macaques (WRAIR)	8	D1ME100, 1 mg IM	3 doses, 0, 1, 5 months	PRNT50 LLC-MK2 cells		Month 6 titers: 20-360	Month 6: 6/8; Month 9: 1/8	IFNg-ELISA	WT DEN1 WP74	1.25 x 10E4 PFU	4 months		4/8 (3/3)
					4	D1ME100 1 mg I.D.	4 doses, 0, 1, 5, 12 months				Month 15: 3/4				4 months		4/4 (2/2)
	Kochel 2000 (34)	Monovalent DNA DEN1 prME (Genes from WP74)	Immuno-genicity, protection	Aotus monkeys	3	D1ME100, 1 mg via ID	3 doses, 0, 1, 5 months	PRNT50 (LLC-MK2 cells)		ID Neuts better than IM	Month 11: 3/3	ND	DEN1 WP74	1.25x10E4 PFU	6 months	Qualitative (Vero cells/IFA)	2/3 (2/2)	Yes
					3	D1ME100, 1 mg via IM					2/3						2/3 (2/2)	Yes
DNA (NMRC)	Putnak 2003 (36)	Monovalnet DNA DEN2 prME (Genes from NGC)	Immuno-genicity, protection	Rhesus macaques	3	2 ug /gene gun	4 doses, 0, 2, 4, 6 months	PRNT50	DEN2 S16803		After 2 doses: 3/3	ND	DEN2 S16803	10E4 PFU	1 month	Amplification and Plaque assay in Vero cells	1/3	Yes
					6	1 ug/gene gun	2 doses,0, 2 months				1/3				1 month or 7 months		1/3, 2/3	Yes
					3	1 ug / gene gun	1 dose				0/3						3/3 (3/3)	Yes
	Raviprakash 2003 (38)	Monovalent DNA DEN1 prME (WP74)	Immuno-genicity, protection	Aotus monkeys (NMRC/WRAIR)	4	D1ME100 1ug + DNA expressing GM-CSF and/or ISS. Needle vs. Biojector (BJ)	3 doses, 0, 1, 5 months	PRNT50 (LLC-MK2 cells)		Best group: DGI-BJ Month 6 GMT 308, lasted 6 months	DGI-BJ at 6 months : 7/7	ND	DEN1	1.25x10E4 PFU	1 month or 6 months	Qualitative (Vero cells/IFA)	1 month challenge:DGI-BJ: 0/3 (4/4). Partial protection in other groups		Beckett 2011 (58)
	Blair 2005 (33)	Monovalent DNA DEN3prME (Asian strain)	Immuno-genicity, protection	Aotus monkeys	6	1012-D3ME 1 mg, I.D.	3 doses, 0, 1, 5 months	PRNT50 (BHK-21 cells)		Month 6: 5/6 animals titers >150		ND	WT DEN3	10E4 PFU	6 months	RT-PCR	44/5 (5/5)	Yes
DNA (Maxigen / NMRC)	Raviprakash 2006 (37)	Tetravalent Chimeric DNA (DNA shuffling) prME or E	Immuno-genicity, protection	Rhesus macaques	6	3 shuffled clones: sA (prME), sB (E ectodomain), sC (prME), 5 mg, I.M. sABC 1.25 mg each, I.M.	3 doses, 0, 1, 4 months	PRNT50		NAbs detected to 4 serotypes after 3 doses		ND	DEN1 WP74, DEN2 OBS-8041	10E5 PFU	5 months	Qualitative (infection of Vero and C6/36 cells/IFA)	DEN1: 8/12; DEN2: 12/12 (5/5)	Yes
DNA (NMRC)	Porter 2012 (35)	Tetravalent DNA prME (sequences from DEN1 WP74, DEN2 Phil-LAMP, DEN3 Phil, DEN4 Philip)	Immuno-genicity, protection	Rhesus macaques, Indian origin	3-4	TVDV 3mg +/- Vaxfectin (Vax)	3 doses, days 0, 28, 84	PRNT50 (Vero cells)		TV+Vax: Day 112: DV2 271, DV3 167; Day 252: DV1 252, DV4 80	After 2 doses 100% to 4 serotypes only in +Vax group	IFNg-ELISPOT, PBMC stimulated with patially purified DEN1 and DEN2	DEN2 OBS8041	10E5 PFU	6 months	Qualitative (infection of Vero cells/IFA)	TVDV:3/4 TVDV+Vax 2/4 (shorter viremia) (3/3)		Monovalent DEN1 in Phase I
Prime/Boost: DNA/ Alphavirus vector (NMRC/ Alphavax)	Chen 2007 (43)	Monovalent Homoloous vs. Heterologous Prime/Boost (genes from WP74)	Immuno-genicity, protection	Cynomolgus macaques (NMRC/WRAIR)	3-4	V=D1ME-VRP (10E8 IU, IM); D=D1ME-DNA (1 mg, Biojector). Three regimes: DDD, VVV, DDV	3 doses, days 0, 28, 117	PRNT50 Vero cells	Serotype cross-neut Abs measured	DDV highest Nab after 3 doses		IFNg-ELISPOT, PBMC stimulated with patially purified DEN1	DEN1 WP74	10E5 PFU	20 weeks	Qualitative (infection of Vero cells/IFA)	Significant protection: DDD and VVV. Complete protection: DDV	Yes
Alphavirus vector (UNC/Global Vaccines)	White 2013 (46)	Monovalent VRP-vectored prME and E85	Immuno-genicity, protection	Rhesus macaques, Indian origin (CPRC)	6	DEN3prME-VRP; DEN3 E85-VRP, 10E8 IU I.D.	3 doses, 0, 7, 25 weeks	FNT50 (Vero cells)	DEN3 CH53498	After 2 doses GMT: 49 for prME-VRP, 214 for E85-VRP	After 2 doses: 100% both vaccines. Pre-challenge: 100% E85-VRP	ND	WT virus DEN3 Sleman/78	10E5 PFU	14 weeks	Immuno-focus Assay	E85-VRP: 0/6, prME-VRP: 2/6 (shorter) (4/4)	Yes
Alphavirus vector (UNC/Global Vaccines)	White 2013 (46)	Tetravalent VRP-vectored E85 Genes from DEN1 UNC 1017, DEN2 UNC 2055, DEN3 UNC 3001, DEN4 UNC 4019)	Immuno-genicity, protection	Rhesus macaques, Indian origin (CPRC)	16 (4 per chall. group)	DEN1 E85-VRP + DEN2 E85-VRP + DEN3 E85=VRP + DEN4 E85=VRP, 10E8 IU each, ID	2 doses, 0 and 6 weeks	FNT50 Vero cells. Genotypic breadth and Nab EDIII targetting addressed	WRAIR / WHO WT strains	After 2 doses, GMT: 283, 446, 202, 284. Pre-challenge GMT: 71, 88, 41, 97	After 1 dose: 81, 81, 69, 88%; After 2 doses: 100% all 4 serotypes; prechallenge: 100% all serotypes	ND	DEN1-4 NIAID WT challenge strains	10E5 PFU	18 weeks	Immuno-focus Assay	DV1 2/4 (shorter); DV2 3/4 (shorter), DV3 0/4, DV4 0/4 (12/12)	Yes
Adenovirus vector (Genphar/ NMRC)	Raviprakash 2008 (45)	Tetravalent: Two bivalent complex adenovirus vector	Immuno-genicity, protection	Rhesus macaques	12 (3 per chall. group)	CAdVax-Den12 + CAdVax-Den34 (10E9 IU IM)	2 doses days 1 and 57	PRNT50 (Vero cells)		Pre- 4wk challenge GMT: 621, 200, 937, 431;	100% to all 4 serotypes	IFNg-ELISPOT, PBMC stimulated with patially purified DEN1	WT strains DEN1WP74, DEN2 OBS8041, DEN3 CH53489, DEN4 341750	~5 x 10E5 PFU	4 weeks	infection of Vero/IFA; plaque assay	DV1 0/3, DV2 1/3, DV3 0/3, DV4 3/3 (Shorter) (12/12)
										Pre-24wk challenge GMT: 575, 191, 220, 312	100% to all 4 serotypes				24 weeks		DV1 1/3 (shorter), DV2 0/3, DV3 0/3, DV4 3/3 (12/12)
Poxvirus vector	Men 2000 (44)	Monovalent rMVA E80	Immuno-genicity, protection	Rhesus macaques	4	rMVA-DEN2E80 10E8 IU I.M.	2 doses, days 0, 28	FRNT ( BHK-21 cells)		Low to moderate titers : 38-70			DEN2 NGC	3x10E5 PFU	28 days	Plaque assay in C6/36 cells	2/4
					4	rMVA-DEN2E80 10E8 IU I.M.	3 doses, days 0, 28, 56			120-280							0/4 (4/4)
Non-replicating PIV (WRAIR / GSK)	Putnak 1996 (41)	Monovalent DEN2 Purified formalin inactivation (PIV)	Immuno-genicity, protection	Rhesus macaques	3	Dose-response of DEN2 PIV + alum. Doses ranging from 0.25 ug to 75 ug	3 doses, 0,1,6 months	PRNT50 (LLC-MK2 cells)		Pre-challenge Nab titers range: 40-1320	100% after 3 doses even at lowest dose	ND	DEN2 S16803	10E4 PFU	8 weeks	Amplification in C6/36 and plaque assay	Dose 0.25: 2/3 (shorter), Dose 2.5: 2/3 (shorter), Dose 7.5: 1/3 (shorter), Dose 25: 2/3 (shorter)		In Phase I
Comparison of 3 platforms PIV, rE, LAV	Putnak 2005 (42)	Monovalent DEN2: PIV WRAIR (D2S16803), rE80 Hawaii Biotech (PR159/S1) and LAV D2S16806-PDK-50)	Immuno-genicity, protection	Rhesus macaques	3	Comparison of 13 vaccine formulations combining Ags: [DEN2 PIV (5ug) or rE80 (1-20ug)] with 5 adjuvants (alum, GSK ASO4-OH, ASO4-PO, ASO5, ASO8) ; and DEN2 LAV 2.5x10E5 IU	2 doses, 0, 90 days	PRNT50 (Vero cells)		After dose 2 peak titers ranging from 50 to 5300. Highest tiers with rE80+ASO4, ASO5 or ASO8, and PIV+ASO5 and ASO8	95% after 1 dose; 100% after 2 doses and before challenge (each formula-tion)	ND	Near WT DEN2 S16803	2x10E4 PFU	8 weeks	Amplification in C6/36 and plaque assay; Taqman quantitative RT-PCR	Near complete protection in some groups by bioassay, but evidence of replication by Taqman and immunological assays	Yes, for all vaccines except LAV
PIV (NMRC)	Maves 2011 (40)	Monovalent DEN1 PIV Psoralen inactivation	Immuno-genicity, protection	Aotus monkeys	7	DEN1 PIV 10 ng +/- alum I.D.	3 doses, 0, 14, 28 days			Day 62 GMT: 129; Prechallenge: 47	Day 62: 7/7; Prechall: 2/7	ND	DEN1 WT WP74	1.1 x10E4 PFU	Day 104	Amplification in Vero cells/IFA	3/7 (shorter) (5/6)
Comparison/Combination of platforms	Simmons 2006 (57)	Monovalent DEN2 DNA, EDIII protein subunit, PIV combinations	Immuno-genicity, protection	Rhesus macaques	4	3 vaccines: D=DNA PrME, 2 ug; R=rEDIII-MBP/alum, 0.5 mg; P=PIV/alum, 6 ug; 7 vaccine combintionss tested	3 doses, days 0, 30, 60	PRNT50 LLC-MK2 cells ; Ab avidity measured		Day 90 GMT=510 (DR/DR/DR); 354 (P/P/P); 287 (DP/DP/DP)	100% after 3 doses	ND	Near WT DEN2 S16803	10E4 PFU	5 months	Infection of Vero/IFA; plaque assay	Significant protection only in group P/P/P (highest Nab and Ab avidity at chall.)	Yes
Prime/Boost	Simmons 2010 (56)	Tetravalent Heterologous non-replicating Prime / LAV Boost	Immuno-genicity, protection	Rhesus macaques, Indian origin (WRAIR)	4	PRIME: TPIV (1 ug each purified formalin-inactivated)(or TV DNA); BOOST:TLAV WRAIR LAV strains	Prime day 0, boost day 60	PRNT50 (Vero cells)		TPIV/TLAV: Day 60 GMT:41,32,28,43. Day 90 GMT: ~1200,6000,500,600. Day 240 GMT: 154, 767, 62, 174		ND	WT DEN3: CH53489	10E5 PFU	8 months	Qualitative (Vero cells/IFA)	TLAV/TLAV: 0/4; TPIV/TLAV:0/4; DNA/DNA/TLAV: 3/4	Yes
													DEN1-4 WRAIR WT strains	10E5 PFU	6 months		TPIV/TLAV: DEN1:0/4; DEN2 0/4, DEN3 0/4, DEN4 0/4	Yes
Recombinant E subunit (Hawaii Biotech / Merck)	Clements 2010 (51)	Monovalent subunit DEN2 rE80 (S2 cells) (genes from PR159/S1)	Immuno-genicity, protection	Rhesus macaques	2	DEN2 rE80 5, 25, 100 ug +50 ug ISCOMATRIXR	3 doses, 0, 1, 3 months	PRNT50 Vero cells		After 2 doses peak titer: 180 to 3000, independent of dose	No correlation between dose and Neut titer	ND	Near WT DEN2 S16803	10E4 PFU	1 month	Amplification in C6/36 / plaque assay	5 ug: 0/2; 25 ug: 2/2; 50 ug: 2/2	Yes	In Phase I
		Tetravalent rE80 (genes from DEN1 258848, DEN3 CH53489, DEN4 H241)			2	TV rE80 (1 or 5 ug from each serotype) +0.1 or 0.5 ug DEN2 rNS1 + 60 ug ISCOMATRIX	4 doses, 0, 1, 2, 3 months			Titers to DEN1,2 higher than titers to DEN3,4	Sero-conversion to all serotypes after 3 doses	Lymphocyte prolipheration assay	Heterologous strains DEN2 S16803, DEN4 341750	10E4 PFU	5 months	Amplification in C6/36 / plaque assay	DEN2: 0/2; DEN4: 1/2	Yes in 2 animals receiving high dose vaccine
rE, EDIII subunit (IPK/CIGB)	Guzman 2003 (53)	Monovalent DEN4 rE subunit (Pichia pastoris)	Immuno-genicity, protection	Cynomolgus macaques	3	DEN4 rE + alum (100 ug)	4 doses, 25 days apart	PRNT50 BHK-21 cells		Peak day 30 titers ranged from 85 to 640		ND	DEN4	10E5 PFU	98 days	Qualitative (infection of C6/36 cells/IFA); RT-PCR	2/3	Yes
	Hermida 2006 (54)	Monovalent rDEN2-EDIII-p64K fusion protein (E.coli) (E gene from strain Jamaica 1982)	Immuno-genicity, protection	Cynomolgus macaques	3	Two variants tested (PD5 and PD3) of DEN2 rEDIII-p64K (50 ug) + CFA or IFA	4 doses, days 0, 30, 94, 210	PRNT50 BHK-21 cells		NAbs developed in a dose-dependent manner		ND	DEN2 A15	10E5 PFU	45 days	Qualitative (amplification in Vero cells/IFA); RT-PCR	PD5 group had no viremia by virus isolation
	Bernardo 2008a (49)	Monovalent rDEN1-EDIII-p64K fusion protein (E.coli) (E Gene from Jamaica CV11636 starin)	Immuno-genicity, protection	Rhesus macaques	2	rDEN1 EDIII-p64K (PD10) Adjuvanted with alum or CFA/IFA	4 doses, days 0, 30, 90, 150	PRNT50 BHK-21 cells	DEN1 WP74	PD10-FA induce Nab titers after 3 doses. Not with alum		ND	DEN1 Jamaica	10E6 PFU	2 months	Amplification in Vero cells/IFA; IFF; RT-PCR
				Cynomolgus macaques	2	rDEN1 EDIII-p64K (PD10) Adjuvanted with CFA/IFA				PD10-FA induce Nab titers after 3 doses
rE, EDIII subunit (IPK/CIGB)	Izquierdo 2008 (55)	rDEN2-EDIII (PD5) in Hermida 2006	Serotype specificity in sera from monkeys in study Hermida 2006					HAI	DEN1 Jamaica 1636, DEN2 Jamaica 1329 TVP965, DEN3 Cuba 116/00, DEN4 Dominica 81	High antigen specificity and low potential for inducing cross-reactive Abs		<------------------------------------ ND ------------------------------------>
	Bernardo 2008b (48)	From Hermida 2006	Post-challenge Anamnestic response (Hermida 2006)		3			IgM ELISA, PRNT50 (BHK-21 cells), HAI	The fully protected monkeys showed the earliest IgM and HAI Abs			<------------------------------------ ND ------------------------------------>
rEDIII subunit (IPK/CIGB)	Bernardo 2009 (47)	DEN1 rEDIII (PD10), DEN2 rEDIII (PD5)	Immuno-genicity: Genotypic breadth	Cynomolgus macaques	3	PD10 (50ug) + CFA/IFA	4 doses	PRNT50 (BHK-21 cells)	DEN1 Jamaica 197;, DEN1 WP74; DEN2 A15 Cuba 1981; DEN2 Jamaica 1982; DEN2 1348600 Colombia 1986	High titers of NAbs were elicited against different genotypes		<------------------------------------ ND ------------------------------------>
					2	PD5 (100ug) + CFA/IFA
Capsid-based subunit (IPK/CIGB)	Gil 2014 (52)	DEN2 NLPs-2 (parent strain: DEN2 Jamaica 1409)	Immuno-genicity, protection	Vervet monkeys	3	NLPs-2 (50 ug) + alum (1.44 mg/ml), S.C.	4 doses, days 0, 60, 120, 180	PRNT50 (Vero)	DEN2 SB8553	All Neut50 titers <10		IFNg-ELISA and cytotoxicity assay. Responders: Day 195 3/3, day 210, 2/3.	DEN2 SB8553	10E3 PFU	Day 30	Plaque assay	2/3 (3/3)
Recombinant Consensus sequence	Chen 2013 (50)	Consensus EDIII Subunit protein (E. coli)	Immuno-genicity	Macaca cyclopis	3	cEDIII (200ug) + alum	2 doses, 0, 8 weeks	FRNT ( BHK-21 cells)	DEN1 Hawaii; DEN2 PL046; DEN3 H-087, DEN4 H241	2/3 monkeys had Nabs to DEN2, not to other serotypes		IL-4- and IFNg-ELISPOT, stimula-tion with cEDIII protein	<------------------------------------ ND ------------------------------------>
					3	cEDIII (200ug)				No NAbs
Abreviations
ND, not determined. NHP, non-human primates. LAV, Live attenuated virus .NCR, Non coding region. NMRC, Naval Medical Research Center. UNC, University of North Carolina. TRPRC, Tulane Regional Primate Research Center. CPRC, Caribbean Primate Research Center, IPK/CIGB, Instituto Pedro Kouri/Centro de Ingenieria Genetica y Biotecnologia. S.C. subcutaneous. I.M. intramuscular. I.D. Intradermal. PRNT,…
DENV strains
	Mahidol strains DEN1: 16007; DEN2:16681; DEN3:16562; DEN4: 1036
	WRAIR/WHO Ref. strains, DEN2 PDK-10. DEN1: WP74; DEN2: S1683 PDK-10; DEN3: CH53489; DEN4: 341750
	NIAID challenge strains: DEN1 Nauru/74 (WP), DEN2 NGC, DEN3 Sleman/78, DEN4 Dominica/81
	WRAIR/WHO WT parental strains. DEN1: WP74; DEN2: S1683; DEN3: CH53489; DEN4: 341750
	WRAIR LAV strains: DEN1 WP74 45AZ5 PDK20 or 27; DEN2 S16803 PDK50; DEN3 CH53489 PDK20; DEN4 341750 PDK6
